# Supplementary material for: Cytosolic DNA sensing combined with differentiation therapy induces irreversible differentiation and cell growth arrest in myeloid leukemia cells
Source: Research Square preprint supplement (doi:10.21203/rs.3.rs-2047508/v3), 2023-05-18
Supplement: Supplementary file 1 [file 25b05a6aa1b1e8779c15e970.pdf]

## **Cytosolic DNA sensing combined with differentiation therapy induces irreversible differentiation and cell growth arrest in myeloid leukemia cells**

Tomohisa Baba, Utano Tomaru, Atsushi Hirao, Naofumi Mukaida, and Yoshikazu Johmura

### **Supplemental Figure Legends**

**Supplementary Figure 1. Apoptosis induction in HL-60 cells.** Apoptosis analysis of HL-60 cells 24 h after treatment with 1  $\mu$ M ATRA, 1  $\mu$ M MRT, or ATRA+MRT. Representative results of FITC-conjugated annexin V and PI staining from three independent experiments are shown here. Percentages of PI<sup>+</sup> annexin V<sup>-</sup>, PI<sup>+</sup> annexin V<sup>+</sup>, and PI<sup>-</sup> annexin V<sup>+</sup> cells among R1-gated cells were determined.

**Supplementary Figure 2. Combined treatment with SBI and ATRA in HL-60 cells.** **(a)** NBT staining of HL-60 cells 24 h after treatment with 1  $\mu$ M ATRA, 1  $\mu$ M MRT, 10  $\mu$ M SBI, ATRA+MRT, or ATRA+SBI. Non-treated cells were used as a control. Representative results from three independent experiments are shown here. **(b)** Cell proliferation of HL-60 cells in drug-free medium after ATRA, SBI, or ATRA+SBI treatment for 24 h ( $n = 4$ ). Cell proliferation was calculated by dividing the values of treated cells with those at 0 h.

**Supplementary Figure 3. Induction of irreversible differentiation by combined treatment with ATRA and MRT in human myeloid leukemia cell lines.** **(a)** Cell proliferation of THP-1, K562, and KG-1 cells in drug-free medium after treatment with 1  $\mu$ M ATRA, 1  $\mu$ M MRT, or ATRA+MRT for 48 h ( $n = 4$ ). Untreated cells were used as a control. Cell proliferation was calculated by dividing the values of treated cells with those at 0 h. **(b)** Microscopic observation of each leukemia cell line 72 h after replating into drug-free fresh medium following 48 h exposure to the indicated

drugs. Representative results from four independent experiments are shown here.

**Supplementary Figure 4. IL-1  $\beta$  is dispensable for ATRA+MRT combined treatment-mediated myeloid differentiation.** Expression of CD11b on HL-60 cells after combined treatment with 1  $\mu$ M ATRA and 1  $\mu$ M MRT in the presence of an anti-IL-1  $\beta$  neutralizing mAb (clone; 8516, R and D Systems) or control mouse IgG1 (Agilent Dako) for 24 h. Representative results from three independent experiments are shown here.

**Supplementary Figure 5. Alteration in the expression of leukocyte activation- and cell cycle-related genes by combined treatment with ATRA and MRT.** Relative mRNA expression of the indicated genes in HL-60 cells 48 h after ATRA, MRT, or ATRA+MRT treatment. Untreated cells were used as a control. Data represent the mean  $\pm$  SD from three independent experiments.  $**P < 0.01$  using Tukey-Kramer test.

**Supplementary Figure 6. AIM2 KD modulates the ATRA+MRT combined treatment-mediated changes in the mRNA expression of leukocyte activation- and cell cycle-related genes.** Relative mRNA expression of the indicated genes in shControl- and shAIM2-transduced HL-60 cells 24 h after ATRA+MRT or ATRA treatment. Data represent the mean  $\pm$  SD from three independent experiments.  $**P < 0.01$  using two-sided Student's *t*-test.

**Supplementary Figure 7. Inhibition of myeloid differentiation by AIM KD in THP-1 cells.** Expression of CD11b (a) and p21 (b) in shControl- and shAIM2-transduced THP-1 cells after combined treatment with 1  $\mu$ M ATRA and 1  $\mu$ M MRT for 48 h. Fold increases in CD11b expression were calculated by dividing the values of treated cells with those of non-treated cells. Data represent the mean  $\pm$  SD from

three independent experiments.  $**P < 0.01$  using Tukey-Kramer test (a). Representative results and mean  $\pm$  SD of MFI from three independent experiments are shown here.  $**P < 0.01$  using Dunnett test (b).

**Supplementary Figure 8. Validation of p21 KD in HL-60 cells.** p21 expression in shControl- and shp21-transduced HL-60 cells, which were incubated in the presence or absence of 1  $\mu$ M ATRA and 1  $\mu$ M MRT for 48 h. The result of a single experiment is shown here.

**Supplementary Figure 9. Morphological changes in MOLM-14 after combined treatment with quizartinib and MRT.** Giemsa and NBT staining of MOLM-14 cells 24 and 48 h after treatment with 5 nM quizartinib or 5 nM quizartinib and 1  $\mu$ M MRT in the presence of 10 ng/ml FGF2. Representative results from three independent experiments are shown here.

**Supplementary Figure 10. AIM KD in MOLM-14 cells.** (a) Effects of AIM2 KD on AIM2 expression in MOLM-14 cells. AIM2 expression levels were determined with the use of a flow cytometer and representative results from three independent experiments are shown here. Expression of p21 (b) and Giemsa staining (c) of shControl- and shAIM2-transduced MOLM-14 cells after combined treatment with 5 nM quizartinib and 1  $\mu$ M MRT in the presence of 10 ng/ml FGF2. Representative results and mean  $\pm$  SD of MFI from three independent experiments are shown here.  $*P < 0.05$  using two-sided Student's *t*-test.

**Supplementary Figure 11. ATRA-pretreatment potentiates the effects of combination treatment with ATRA and MRT.** Cell proliferation of MOLM-13 cells in drug-free medium was determined 24 h (a) and 6 h (b) after combined incubation with 1  $\mu$ M ATRA and 1  $\mu$ M MRT following exposure to 1  $\mu$ M ATRA for

48 h ( $n = 4$ ).

**Supplementary Figure 12. Unabridged data of western blot analysis of p21 ubiquitination.**

**Supplementary Figure 13. Gating strategy of flow cytometric analysis.** Representative data of light scattering of unfixed and fixed HL-60 cells are shown here.

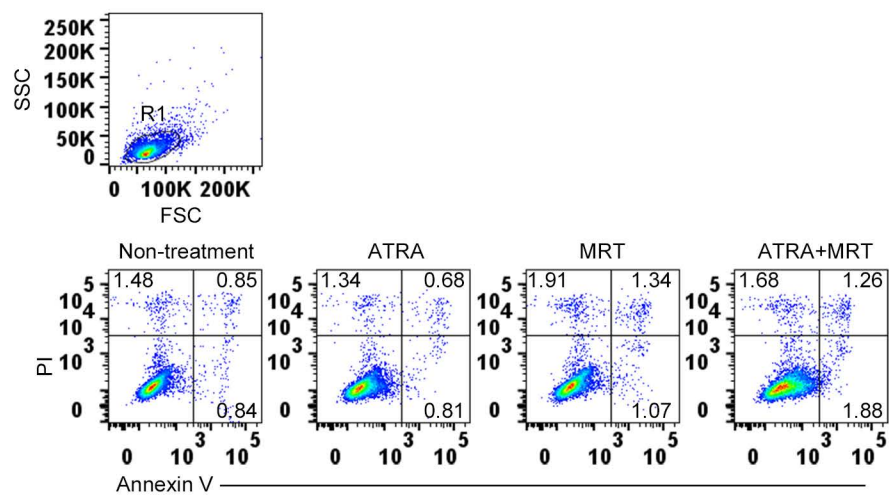

Supplementary Figure 1

**a**

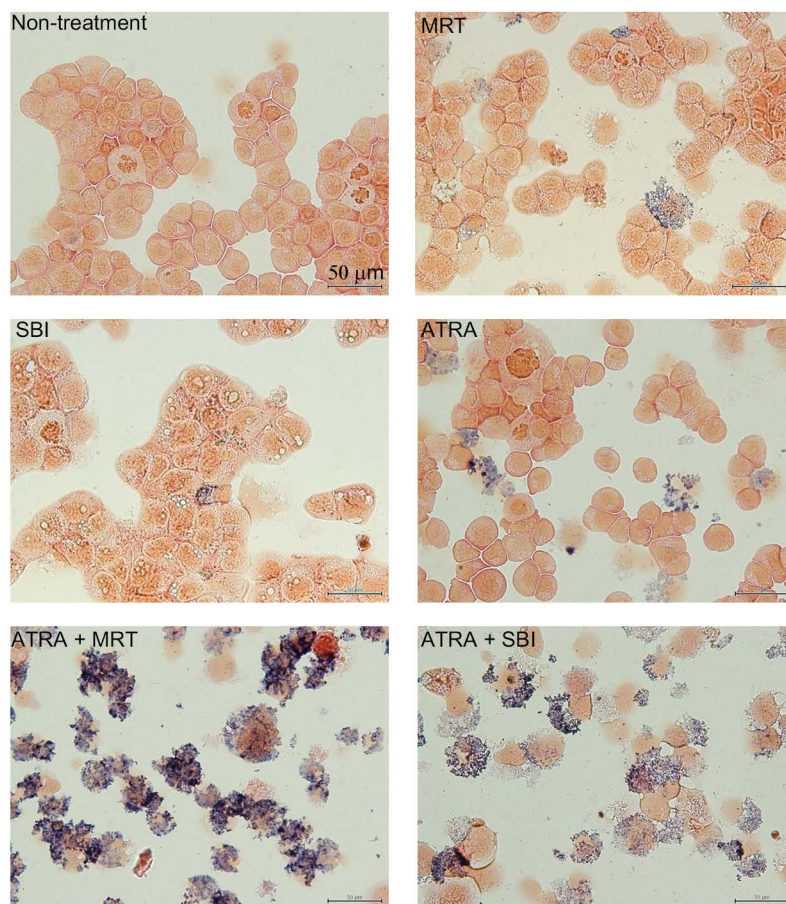

**b**

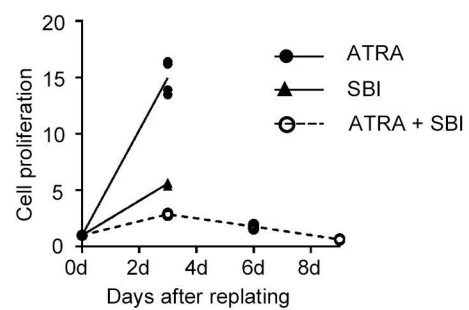

**Supplementary Figure 2**

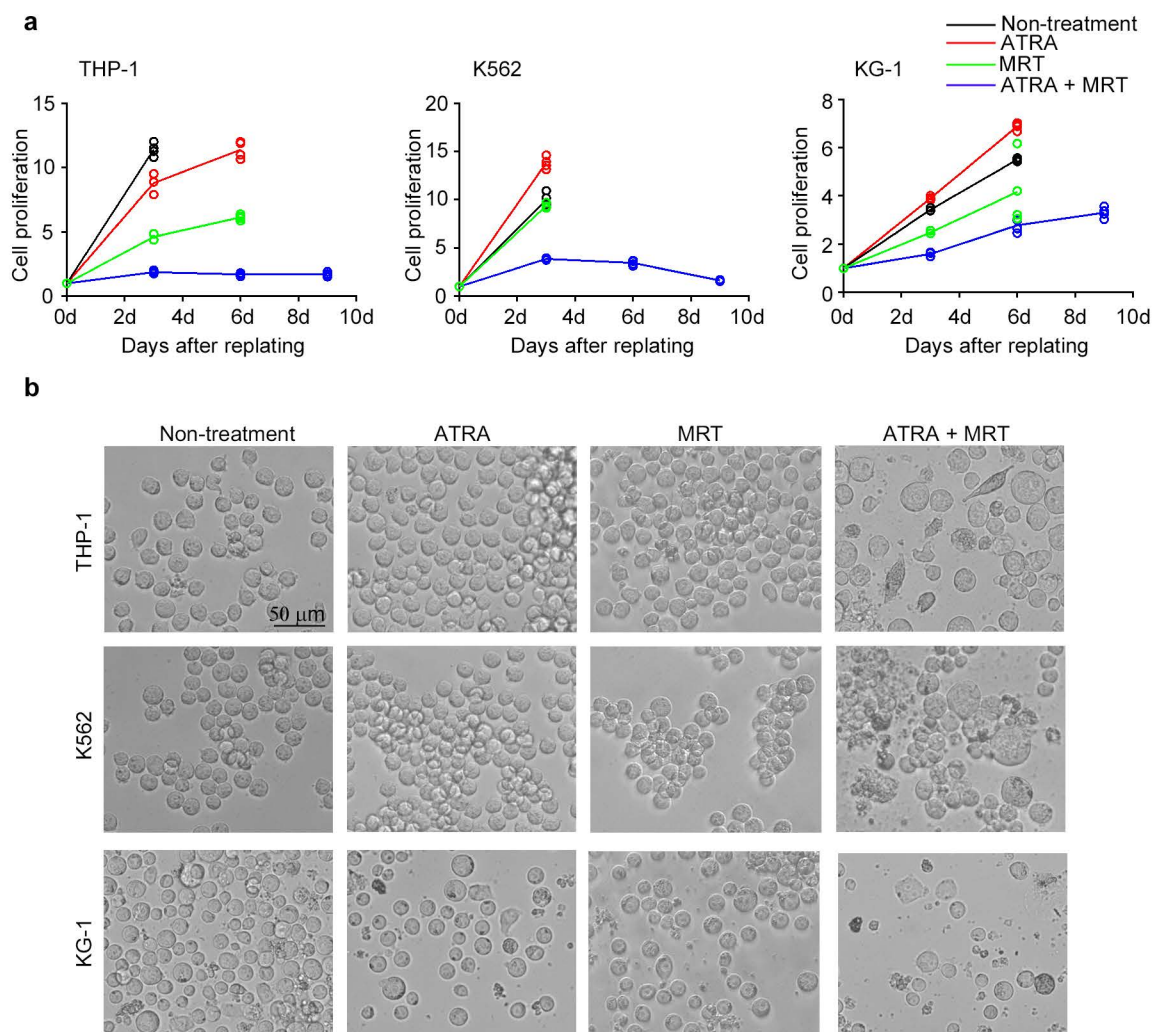

**Supplementary Figure 3**

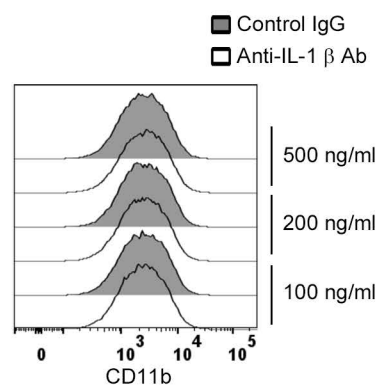

**Supplementary Figure 4**



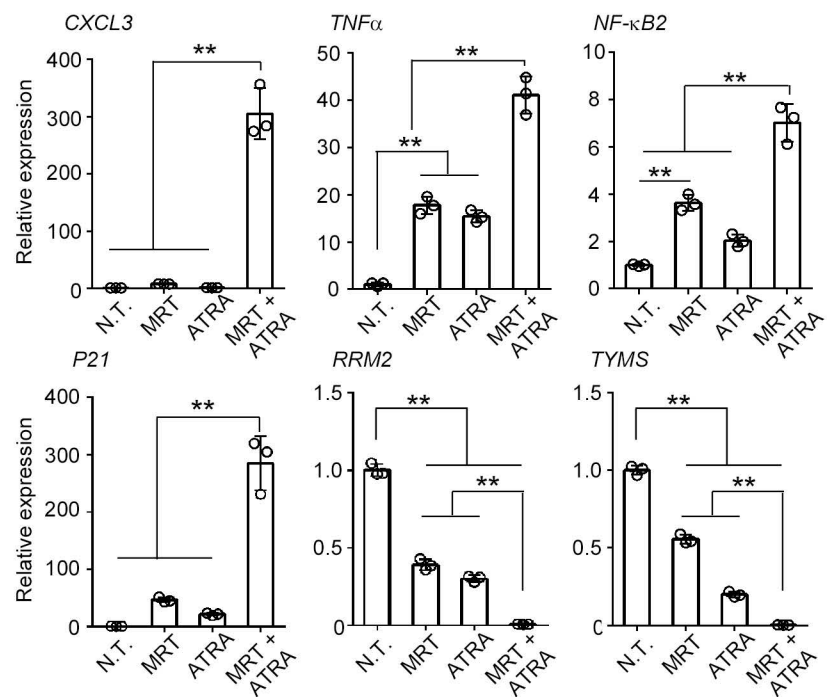

**Supplementary Figure 5**

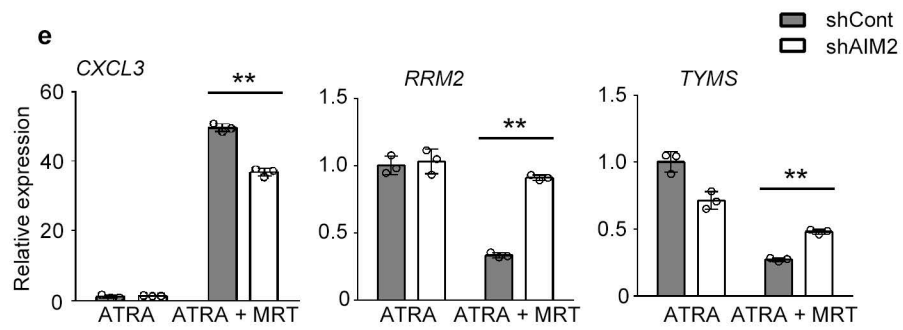

**Supplementary Figure 6**

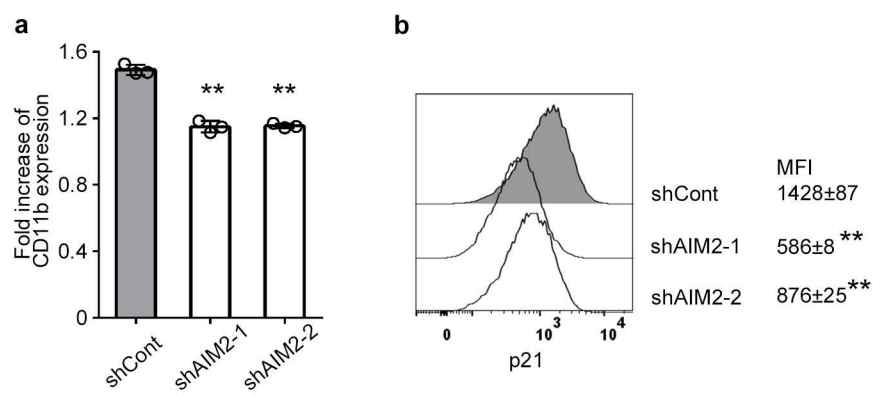

**Supplementary Figure 7**

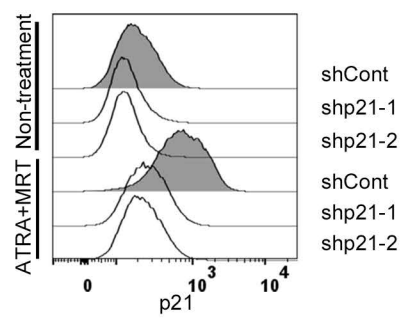

**Supplementary Figure 8**

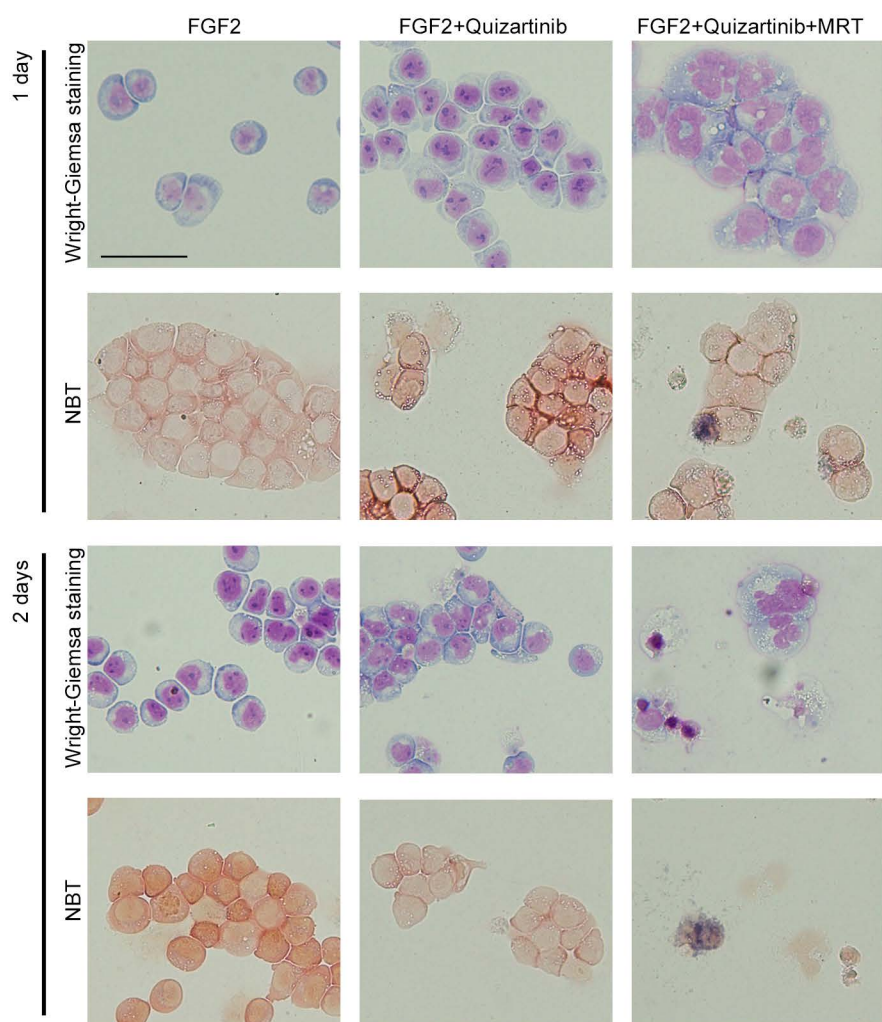

**Supplementary Figure 9**

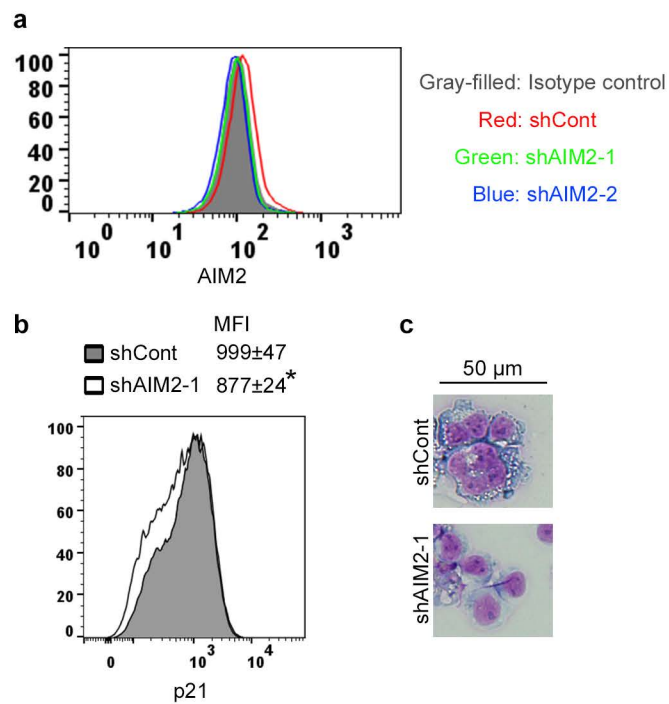

**Supplementary Figure 10**

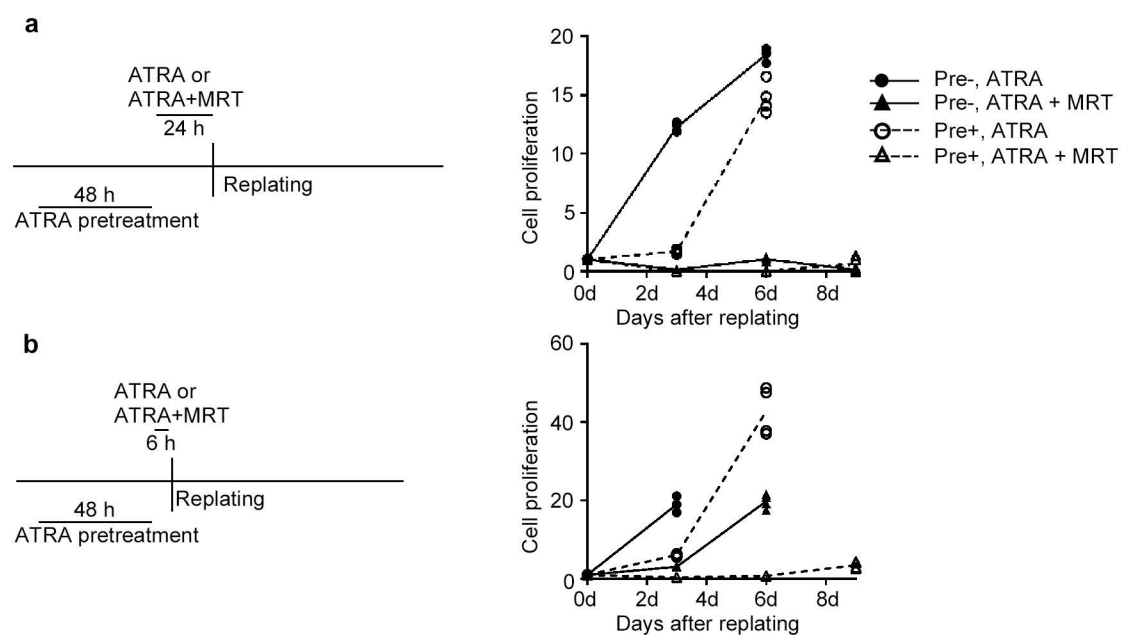

**Supplementary Figure 11**

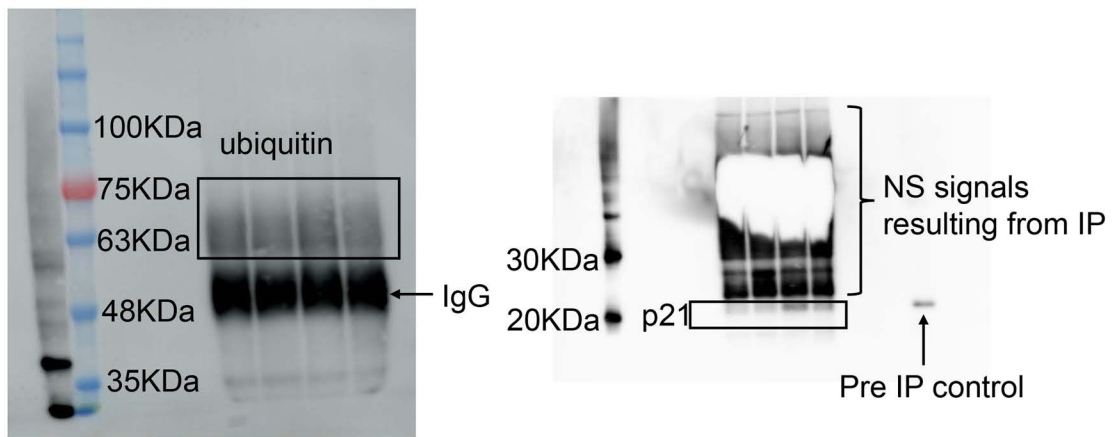

Samples (From left to right):  
 DMSO-treated shControl cells, DMSO-treated shAIM2 cells,  
 ATRA+MRT-treated shControl cells, ATRA+MRT-treated shAIM2 cells

**Supplementary Figure 12**



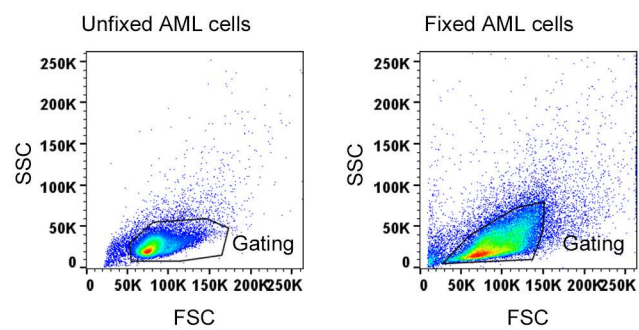

**Supplementary Figure 13**
